# Supplementary material for: Vertical Slot Fishways: Incremental Knowledge to Define the Best Solution
Source: MDPI journal article supplement (doi:10.3390/biology12111431), 2023-11-15
Supplement: s1 [file s1]

## Supplementary material

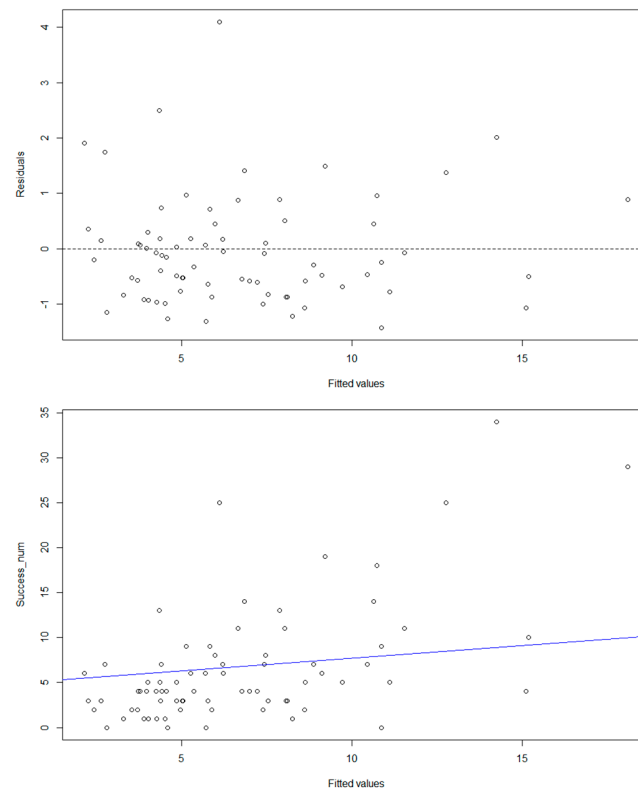

**Figure S1.** – Graphical validation for the model concerning the first question “What variables affect fish passage during experimental fishway studies?”. Pearson residuals versus fitted values on the left and observed data versus fitted values on the right.

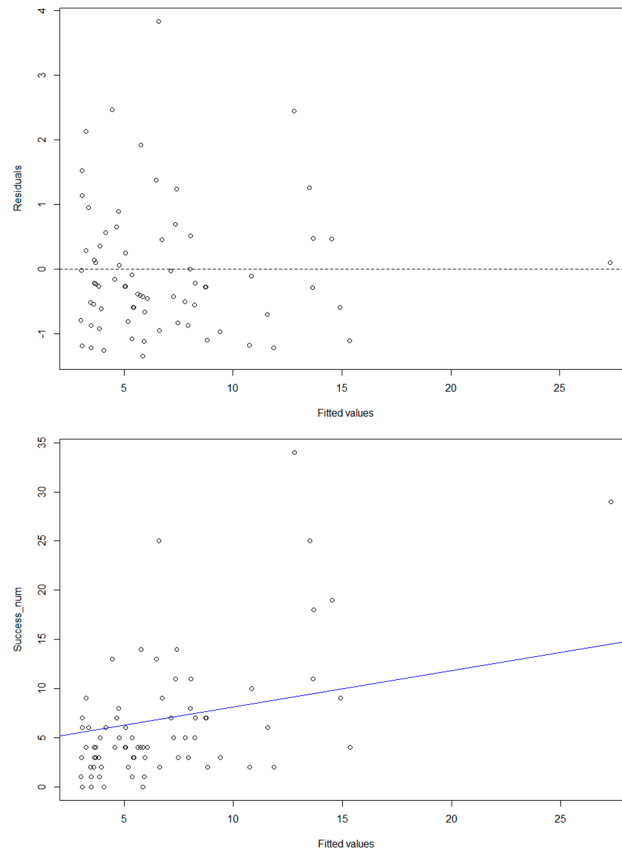

**Figure S2.** – Graphical validation for the model concerning the second question “What is the best VSF configuration?”. Pearson residuals versus fitted values on the left and observed data versus fitted values on the right.

**Table S1.** – Details of the variables excluded from the modelling procedures.

| Type of Variable | Variable                         | Acronym    | Description                                                             | Unit/levels                            |
|------------------|----------------------------------|------------|-------------------------------------------------------------------------|----------------------------------------|
| Factor           | Year                             | Time_year  | Identification of the year in which the experiment took place           | 2015 and 2016                          |
| Factor           | Month                            | Time_month | Identification of the month in which the experiment took place          | May, June, July, September and October |
| Continuous       | Discharge in the Fishway         | Discharge  | Discharge used during each experiment                                   | $l\ s^{-1}$                            |
| Continuous       | Average body mass of fish school | Mass_avg   | Average body mass considering the five fish present in each fish school | g                                      |

| Type of Variable | Variable                                       | Acronym    | Description                                                                                  | Unit/levels |
|------------------|------------------------------------------------|------------|----------------------------------------------------------------------------------------------|-------------|
| Continuous       | Standard Deviation of body mass of fish school | Mass_std   | Standard deviation of body mass considering the five fish present in each fish school        | g           |
| Continuous       | Standard deviation length of fish school       | Length_std | Standard Deviation of the total length considering the five fish present in each fish school | cm          |
| Continuous       | Water temperature in the acclimation tanks     | Temp_aclim | Water temperature in the acclimation tanks measured before the experiment                    | ° C         |
| Continuous       | Water pH in the fishway                        | pH_PPP     | Water pH in the fishway                                                                      |             |
